# Supplementary material for: Thymol Increases Sensitivity of Clinical Col-R Gram-Negative Bacteria to Colistin
Source: PubMed Central journal article supplement (PMC9431615; doi:10.1128/spectrum.00184-22), 2022-06-14
Supplement: spectrum.00184-22-s0001.pdf [file spectrum.00184-22-s0001.pdf]

**Table S1** Patient's clinical data and characteristics of analyzed strains.

| Species              | Strains           | Isolation Date | Age        | Gender | Sample | Ward          |
|----------------------|-------------------|----------------|------------|--------|--------|---------------|
| <i>P. aeruginosa</i> | TL1671            | 11/04/2015     | 74         | M      | Wound  | Endocrinology |
|                      | TL1736            | 20/05/2015     | 44         | M      | Sputum | Neurosurgery  |
|                      | TL1744            | 23/05/2015     | 63         | M      | Sputum | ICU           |
|                      | TL2314            | 08/03/2016     | 66         | M      | Sputum | ICU           |
|                      | TL2917            | 09/02/2017     | 58         | M      | Sputum | ICU           |
|                      | TL2967            | 13/03/2017     | 26         | M      | Sputum | Emergency     |
|                      | TL3008            | 05/04/2017     | 67         | M      | Sputum | Neurosurgery  |
|                      | TL3086            | 24/05/2017     | 65         | M      | Sputum | Neurosurgery  |
|                      | <i>E. cloacae</i> | CG648          | 26/05/2015 | 44     | M      | blood         |
| CG737                |                   | 12/09/2015     | 72         | M      | Wound  | Endocrinology |

---

|                |        |            |    |   |                |                          |
|----------------|--------|------------|----|---|----------------|--------------------------|
|                | CG741  | 15/09/2016 | 72 | M | tissue         | Endocrinology            |
|                | CG884  | 24/04/2016 | 70 | F | Drainage fluid | ICU                      |
|                | CG1050 | 30/09/2016 | 81 | F | blood          | geriatric                |
|                | CG1051 | 04/10/2016 | 81 | M | catheter       | geriatric                |
|                | CG1479 | 08/01/2018 | 37 | M | Urine          | Urology                  |
|                | CG1574 | 07/05/2018 | 51 | F | ascites        | Hematology               |
| <i>E. coli</i> | DC90   | 27/03/2012 | 76 | M | Wound          | Gastrointestinal Surgery |
|                | DC3737 | 05/05/2015 | 52 | M | Wound          | Orthopedics              |
|                | DC3806 | 19/05/2015 | 17 | F | Sputum         | Hematology               |
|                | DC3846 | 28/05/2015 | 77 | F | Urine          | Urology                  |
|                | DC4887 | 23/02/2016 | 63 | M | Urine          | Urology                  |
|                | DC5262 | 18/05/2016 | 32 | F | Urine          | Emergency                |
|                | DC5286 | 23/05/2016 | 82 | F | Urine          | Endocrinology            |

---

---

|                      |        |            |    |   |                |               |
|----------------------|--------|------------|----|---|----------------|---------------|
|                      | DC7333 | 18/05/2016 | 32 | M | Drainage fluid | ICU           |
|                      | FK20   | 08/03/2012 | 88 | F | Sputum         | Neurology     |
|                      | FK150  | 19/06/2012 | 60 | M | Pus            | Emergency     |
|                      | FK169  | 02/07/2012 | 79 | F | Sputum         | General       |
| <i>K. pneumoniae</i> | FK1913 | 19/01/2015 | 74 | M | Sputum         | Neurosurgery  |
|                      | FK1986 | 03/03/2015 | 44 | M | Blood          | Endocrinology |
|                      | FK3810 | 17/03/2017 | 21 | F | Stool          | ICU           |
|                      | FK6663 | 04/05/2019 | 73 | M | Stool          | ICU           |
|                      | FK6696 | 09/05/2019 | 52 | M | Bile           | Emergency     |

---

**Abbreviations:** M, Male; F, Female.
